# Supplementary material for: Global Leadership Initiative on Malnutrition-Diagnosed Malnutrition in Lung Transplant Candidates
Source: MDPI journal article supplement (doi:10.3390/nu16030376), 2024-01-27
Supplement: s1 [file s1]

**Table S1.** Characteristics of malnourished population by GLIM criteria in obstructive diseases.

|                                    | Obstructive Diseases (N = 483) |                  |          |
|------------------------------------|--------------------------------|------------------|----------|
|                                    | Malnourished                   | Not Malnourished | <i>p</i> |
| N                                  | 223                            | 260              |          |
| Age                                | 55.6 (7.4)                     | 56.7 (7.3)       | <0.05    |
| Male/Female                        | 68.2% / 31.8%                  | 82.3% / 17.7%    | <0.001   |
| FEV1 (%)                           | 25.7 (12.6)                    | 24.4 (10.0)      | NS       |
| TLC (%)                            | 125.3 (39.7)                   | 119.9 (31.8)     | NS       |
| pCO <sub>2</sub> (mmHg)            | 47.5 (9.4)                     | 47.0 (8.0)       | NS       |
| WL 6 months (yes)                  | 43.5%                          | 8.0%             | <0.001   |
| WL 6 months (kg)                   | 4.7 (3.2)                      | 2.1 (0.8)        | <0.001   |
| WL 6 months (%)                    | 7.6 (4.5)                      | 3.0 (1.0)        | <0.001   |
| Oral nutritional supplements (yes) | 11.7%                          | 2.0%             | <0.001   |
| Weight (kg)                        | 58.3 (10.5)                    | 75.9 (12.1)      | <0.001   |
| BMI (kg/m <sup>2</sup> )           | 21.0 (3.0)                     | 27.0 (3.4)       | <0.001   |
| TSF (mm)                           | 12.9 (6.4)                     | 15.0 (6.0)       | <0.001   |
| SSF (mm)                           | 12.8 (5.7)                     | 18.7 (5.4)       | <0.001   |
| AC (cm)                            | 25.7 (3.0)                     | 30.3 (2.8)       | <0.001   |
| MAMC (cm)                          | 21.6 (2.4)                     | 25.6 (2.2)       | <0.001   |
| FM (kg)                            | 13.6 (6.8)                     | 22.6 (7.7)       | <0.001   |
| FFM (kg)                           | 44.8 (7.6)                     | 53.6 (8.2)       | <0.001   |
| Albumin (g/dL)                     | 4.0 (0.4)                      | 4.1 (0.4)        | NS       |
| Prealbumin (mg/dL)                 | 23.4 (6.2)                     | 23.8 (5.3)       | NS       |
| Cholesterol (mg/dL)                | 198.6 (43.5)                   | 198.8 (38.1)     | NS       |
| HDL-cholesterol (mg/dL)            | 54.4 (16.4)                    | 49.9 (18.2)      | <0.001   |
| LDL-cholesterol (mg/dL)            | 122.2 (38.6)                   | 124.1 (33.2)     | NS       |
| Triglycerides (mg/dL)              | 105.1 (44.1)                   | 122.7 (57.6)     | <0.001   |
| CRP (mg/L)                         | 7.7 (18.7)                     | 9.8 (19.3)       | <0.01    |

FEV1, forced expiratory volume; TLC, total lung capacity; WL, unintentional weight loss; BMI, body mass index; TSF, triceps skinfold thickness; SSF, subscapular skinfold thickness; AC, arm circumference; MAMC, mid-arm muscle circumference; FM, fat mass; FFM, fat-free mass; CRP, C-reactive protein. Plus-minus values are means  $\pm$  SD.

**Table S2.** Characteristics of malnourished population by GLIM criteria in interstitial lung diseases.

|                                    | Interstitial Lung Diseases (N = 388) |                  |          |
|------------------------------------|--------------------------------------|------------------|----------|
|                                    | Malnourished                         | Not Malnourished | <i>p</i> |
| N                                  | 122                                  | 266              |          |
| Age                                | 52.3 (11.5)                          | 55.4 (8.5)       | <0.05    |
| Male/Female                        | 66.4% / 33.6%                        | 74.1% / 25.9%    | NS       |
| FEV1 (%)                           | 41.8 (16.4)                          | 49.5 (14.9)      | NS       |
| TLC (%)                            | 48.8 (14.4)                          | 59.8 (22.9)      | NS       |
| pCO <sub>2</sub> (mmHg)            | 43.7 (7.5)                           | 41.0 (5.1)       | NS       |
| WL 6 months (yes)                  | 53.9%                                | 8.4%             | <0.001   |
| WL 6 months (kg)                   | 6.2 (3.7)                            | 3.0 (1.4)        | <0.001   |
| WL 6 months (%)                    | 8.5 (4.6)                            | 3.4 (1.0)        | <0.001   |
| Oral nutritional supplements (yes) | 11.0%                                | 0.8%             | <0.001   |
| Weight (kg)                        | 65.5 (13.5)                          | 80.3 (12.2)      | <0.001   |
| BMI (kg/m <sup>2</sup> )           | 23.7 (4.1)                           | 28.8 (3.5)       | <0.001   |
| TSF (mm)                           | 15.8 (7.3)                           | 17.6 (6.3)       | <0.01    |
| SSF (mm)                           | 16.3 (7.2)                           | 21.5 (6.5)       | <0.001   |

|                         |              |              |        |
|-------------------------|--------------|--------------|--------|
| AC (cm)                 | 27.3 (3.7)   | 31.5 (2.9)   | <0.001 |
| MAMC (cm)               | 22.2 (3.1)   | 26.0 (2.4)   | <0.001 |
| FM (kg)                 | 19.2 (9.2)   | 26.4 (8.0)   | <0.001 |
| FFM (kg)                | 46.1 (8.8)   | 54.2 (9.1)   | <0.001 |
| Albumin (g/dL)          | 3.9 (0.4)    | 4.0 (0.4)    | NS     |
| Prealbumin (mg/dL)      | 25.1 (8.6)   | 24.6 (6.0)   | NS     |
| Cholesterol (mg/dL)     | 198.8 (39.9) | 201.1 (40.4) | NS     |
| HDL-cholesterol (mg/dL) | 49.0 (14.0)  | 46.4 (15.2)  | <0.05  |
| LDL-cholesterol (mg/dL) | 125.6 (31.9) | 126.7 (37.0) | NS     |
| Triglycerides (mg/dL)   | 132.1 (63.6) | 136.6 (56.9) | NS     |
| CRP (mg/L)              | 12.2 (17.3)  | 8.3 (13.8)   | NS     |

FEV1, forced expiratory volume; TLC, total lung capacity; WL, unintentional weight loss; BMI, body mass index; TSF, triceps skinfold thickness; SSF, subscapular skinfold thickness; AC, arm circumference; MAMC, mid-arm muscle circumference; FM, fat mass; FFM, fat-free mass; CRP, C-reactive protein. Plus-minus values are means  $\pm$  SD.

**Table S3.** Characteristics of malnourished population by GLIM criteria in cystic fibrosis and non-cystic fibrosis bronchiectasis.

|                                    | CF/NCFB (N = 163) |                  |          |
|------------------------------------|-------------------|------------------|----------|
|                                    | Malnourished      | Not Malnourished | <i>p</i> |
| N                                  | 137               | 26               |          |
| Age                                | 28.4 (10.3)       | 40.50 (10.50)    | <0.001   |
| Male/Female                        | 47.5% / 52.5%     | 65.4% / 34.6%    | NS       |
| FEV1 (%)                           | 25.8 (10.1)       | 29.3 (7.2)       | NS       |
| TLC (%)                            | 100.7 (19.7)      | 119.0 (7.8)      | NS       |
| pCO2 (mmHg)                        | 47.1 (6.9)        | 43.7 (3.6)       | NS       |
| WL 6 months (yes)                  | 48.8%             | 13.6%            | <0.01    |
| WL 6 months (kg)                   | 4.6 (2.8)         | 1.5 (0.9)        | <0.05    |
| WL 6 months (%)                    | 8.3 (4.9)         | 2.3 (1.5)        | <0.05    |
| Oral nutritional supplements (yes) | 67.9%             | 20.0%            | <0.001   |
| Weight (kg)                        | 51.1 (8.9)        | 73.7 (14.4)      | <0.001   |
| BMI (kg/m <sup>2</sup> )           | 19.0 (2.7)        | 25.8 (3.6)       | <0.001   |
| TSF (mm)                           | 11.6 (6.3)        | 16.1 (5.9)       | <0.01    |
| SSF (mm)                           | 9.8 (4.5)         | 18.0 (6.5)       | <0.001   |
| AC (cm)                            | 23.1 (3.2)        | 30.4 (3.0)       | <0.001   |
| MAMC (cm)                          | 19.5 (2.5)        | 25.3 (2.6)       | <0.001   |
| FM (kg)                            | 9.4 (5.0)         | 21.4 (7.9)       | <0.001   |
| FFM (kg)                           | 41.9 (8.3)        | 54.3 (9.2)       | <0.001   |
| Albumin (g/dL)                     | 3.8 (0.5)         | 3.9 (0.6)        | NS       |
| Prealbumin (mg/dL)                 | 17.4 (5.9)        | 21.0 (7.5)       | <0.05    |
| Cholesterol (mg/dL)                | 135.2 (43.1)      | 165.2 (35.8)     | <0.001   |
| HDL-cholesterol (mg/dL)            | 42.8 (15.9)       | 46.3 (15.0)      | NS       |
| LDL-cholesterol (mg/dL)            | 78.7 (32.6)       | 101.7 (25.8)     | <0.001   |
| Triglycerides (mg/dL)              | 84.4 (36.9)       | 82.0 (27.5)      | NS       |
| CRP (mg/L)                         | 23.5 (29.9)       | 10.5 (9.6)       | <0.05    |

CF, cystic fibrosis; NCFB, non-cystic fibrosis bronchiectasis; FEV1, forced expiratory volume; TLC, total lung capacity; WL, unintentional weight loss; BMI, body mass index; TSF, triceps skinfold thickness; SSF, subscapular skinfold thickness; AC, arm circumference; MAMC, mid-arm muscle circumference; FM, fat mass; FFM, fat-free mass; CRP, C-reactive protein. Plus-minus values are means  $\pm$  SD.

**Table S4.** Characteristics of malnourished population by GLIM criteria in vascular diseases.

|                                    | Vascular Diseases (N = 26) |                  |          |
|------------------------------------|----------------------------|------------------|----------|
|                                    | Malnourished               | Not Malnourished | <i>p</i> |
| N                                  | 16                         | 10               |          |
| Age                                | 37.9 (11.8)                | 43.5 (9.7)       | NS       |
| Male/Female                        | 37.5% / 62.5%              | 50.0% / 50.0%    | NS       |
| FEV1 (%)                           | 98.0 (17.0)                | 69.9 (-)         | NS       |
| TLC (%)                            | 98.0 (18.4)                | -                | -        |
| pCO2 (mmHg)                        | 30.5 (5.0)                 | -                | -        |
| WL 6 months (yes)                  | 66.7%                      | 0.0%             | <0.05    |
| WL 6 months (kg)                   | 3.8 (2.8)                  | -                | -        |
| WL 6 months (%)                    | 5.2 (4.0)                  | -                | -        |
| Oral nutritional supplements (yes) | 6.3%                       | 0.0%             | NS       |
| Weight (kg)                        | 64.0 (15.2)                | 79.7 (11.0)      | <0.01    |
| BMI (kg/m <sup>2</sup> )           | 23.5 (5.5)                 | 29.3 (3.0)       | <0.01    |
| TSF (mm)                           | 16.3 (7.8)                 | 18.9 (5.1)       | NS       |
| SSF (mm)                           | 14.4 (8.7)                 | 23.4 (5.8)       | <0.01    |
| AC (cm)                            | 26.9 (6.4)                 | 32.0 (3.2)       | <0.01    |
| MAMC (cm)                          | 21.8 (5.3)                 | 26.1 (3.0)       | <0.05    |
| FM (kg)                            | 16.1 (9.1)                 | 24.9 (7.7)       | <0.05    |
| FFM (kg)                           | 46.1 (10.3)                | 54.9 (11.0)      | NS       |
| Albumin (g/dL)                     | 4.1 (0.4)                  | 4.0 (0.4)        | NS       |
| Prealbumin (mg/dL)                 | 23.2 (5.9)                 | 24.8 (5.6)       | NS       |
| Cholesterol (mg/dL)                | 145.7 (30.9)               | 208.5 (62.7)     | <0.05    |
| HDL-cholesterol (mg/dL)            | 36.2 (9.2)                 | 38.2 (12.3)      | NS       |
| LDL-cholesterol (mg/dL)            | 86.4 (29.3)                | 142.2 (53.4)     | <0.01    |
| Triglycerides (mg/dL)              | 112.2 (47.5)               | 137.7 (40.1)     | NS       |
| CRP (mg/L)                         | 5.6 (11.0)                 | 4.4 (2.8)        | NS       |

FEV1, forced expiratory volume; TLC, total lung capacity; WL, unintentional weight loss; BMI, body mass index; TSF, triceps skinfold thickness; SSF, subscapular skinfold thickness; AC, arm circumference; MAMC, mid-arm muscle circumference; FM, fat mass; FFM, fat-free mass; CRP, C-reactive protein. Plus-minus values are means  $\pm$  SD.
